# Supplementary material
Source: PubMed Central journal article supplement (PMC5054302)

**Figure 1S** Effect of 2-hydroxy-naphthoquinones on  $bc_1$  activity of mitochondrial membranes isolated from yeast with the Y279S cytochrome b mutation. The cytochrome  $c$  reductase activity of mitochondrial membranes was measured as described in Materials and Methods in the presence of increasing concentrations of inhibitor. The assays were performed in duplicate and the results are shown as averages. Activities are expressed as a percentage of the turnover number of each strain in the absence of inhibitor. The two inhibitors tested were NQ1 ( $\blacktriangle$ ) and NQ2 ( $\blacklozenge$ ).

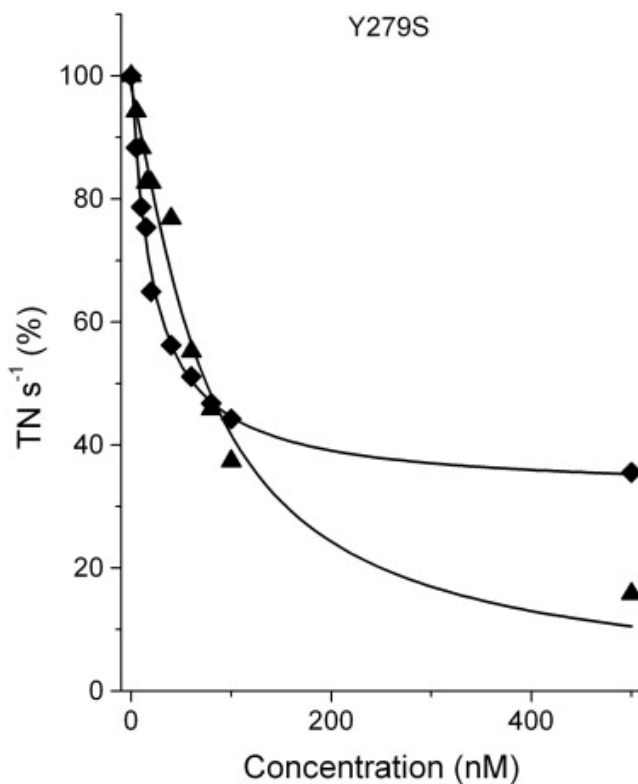

Supplement: NIHMS819538-supplement-suppl_data.pdf [file NIHMS819538-supplement-suppl_data.pdf]
